# Supplementary material for: LC-MS-based metabolomic characterization of Tinospora crispa extracts: impact of solvent selection on phytochemical composition and antioxidant properties
Source: Royal Society of Chemistry journal article supplement (doi:10.1039/d5ra07211e), 2025-01-01
Supplement: d5ra07211e2.xlsx [file d5ra07211e2.xlsx]

## Sheet: 106-Median__Pos
	EA-A1	EA-A2	EA-A3	EA-B1	EA-B2	EA-B3	EA-C1	EA-C2	EA-C3	EA-D1	EA-D2	EA-D3	EA-E1	EA-E2	EA-E3	EtOH-A1	EtOH-A2	EtOH-A3	EtOH-B1	EtOH-B2	EtOH-B3	EtOH-C1	EtOH-C2	EtOH-C3	EtOH-D1	EtOH-D2	EtOH-D3	EtOH-E1	EtOH-E2	EtOH-E3	H2O-A1	H2O-A2	H2O-A3	H2O-B1	H2O-B2	H2O-B3	H2O-C1	H2O-C2	H2O-C3	H2O-D1	H2O-D2	H2O-D3	H2O-E1	H2O-E2	H2O-E3
	EA	EA	EA	EA	EA	EA	EA	EA	EA	EA	EA	EA	EA	EA	EA	EtOH	EtOH	EtOH	EtOH	EtOH	EtOH	EtOH	EtOH	EtOH	EtOH	EtOH	EtOH	EtOH	EtOH	EtOH	H2O	H2O	H2O	H2O	H2O	H2O	H2O	H2O	H2O	H2O	H2O	H2O	H2O	H2O	H2O
(-)-Nuciferine	1233	1631	1288	384	294.5	174.9	256.6	148.8	286.4	0	0	0	691.2	610.4	647.3	5237	5492	5543	905.2	1065	1156	723.4	654	758.1	405.8	288	387	3185	3206	2873	0	0	0	0	0	0	0	0	0	0	0	0	0	0	0
(+/-) Salsolinol	0	0	0	0	0	0	0	0	0	0	0	0	0	0	0	1719	2037	1990	8068	8847	9573	16770	13680	16490	9771	4489	9843	2085	2288	1992	11990	11650	11250	34390	32600	34100	29250	29370	29270	4459	5736	5866	17700	18190	17370
(E)-1-(3,4-dihydroxy-2,6-dimethoxyphenyl)-3-phenylprop-2-en-1-one	0	0	0	0	0	147.5	0	0	0	0	0	0	2197	2146	2294	0	0	0	0	0	0	0	0	0	0	0	0	1875	1780	1925	0	0	0	0	0	0	0	0	0	0	0	0	0	0	0
(E)-N-[2-hydroxy-2-(4-hydroxyphenyl)ethyl]-3-(4-hydroxy-3-methoxyphenyl)prop-2-enamide	3853	4358	3578	9484	4641	5339	4214	4522	4979	4151	3895	4525	6142	6272	6471	8649	8817	8952	8434	8696	8403	8241	6916	8440	9538	10240	10200	9595	9699	9193	0	0	0	3627	3118	3255	6199	6560	6332	0	0	0	2482	2307	2344
(E,E)-Piperlonguminine; AIF; CE10; CorrDec	5856	4976	4423	0	0	0	4363	4529	4020	0	0	0	0	0	0	3177	3404	3281	0	0	0	2476	2282	2855	1730	998.3	1412	0	0	0	0	0	0	0	0	0	0	0	0	0	0	0	0	0	0
?-Linolenic acid	437.2	672.2	267.8	310.7	0	0	0	0	245.9	1089	322.9	212.2	529.6	0	0	806	380.2	258.6	980.4	0	478.1	681.7	687.1	558.7	418.3	634	0	0	0	0	0	0	0	0	0	0	0	0	0	0	0	0	0	0	0
1,5,6,7-Tetrahhydro-4H-indol-4-One	0	0	0	2989	2429	2566	1579	1329	1545	704.8	545.4	844.1	419.1	425.4	482	0	0	0	3643	3578	3645	1666	1274	1617	1575	1539	1561	838.6	979	907.4	0	0	0	1022	1024	960.5	2370	2078	2272	855.1	804.6	734.7	903.7	1046	891.1
13-OxoODE	39630	38520	37240	19090	22460	82840	23880	31450	28420	78000	22020	68640	10520	9237	13910	27540	31870	36880	24490	39950	20860	18520	18770	27720	32120	63520	29730	8545	7573	9473	659.9	740.6	644.8	259.5	244.2	279.6	0	0	0	1170	1464	1407	0	0	0
2',3',6-Trimethoxyflavone	787.9	614.1	482.6	0	0	0	0	114.4	119.8	0	0	0	1810	1732	1931	328.1	320.4	336.5	0	0	0	0	0	0	0	0	0	1379	1435	1392	0	0	0	0	0	0	0	0	0	0	0	0	0	0	0
22-Hydoxy-2-hopen-1-one	4752	4018	2756	2065	1536	1831	1504	1388	1813	228.3	235.8	349.5	3280	1163	1466	5235	5575	3166	2394	2221	1974	3085	2970	3133	2083	1263	1499	3409	3738	1664	0	0	0	0	0	0	0	0	0	0	0	0	0	0	0
3-Hydroxy-3',4'-Dimethoxyflavone	0	0	0	0	0	0	0	0	0	0	0	0	4607	5055	4935	124.5	141.6	135.9	127.7	134.8	131.5	0	0	0	0	0	0	5337	5392	5203	0	0	0	0	0	0	0	0	0	167.1	0	149	0	0	0
3-Phenyllactic acid	1333	947.3	888.3	2453	2188	2146	464.7	385.8	951.1	306.8	286.6	653.3	842	921.7	811.3	377.2	384.2	384.6	1622	1658	1819	152.6	0	135.1	159.5	179	296.2	357.1	355.3	333.2	0	0	0	0	0	0	0	0	0	0	0	0	0	0	0
4-Hydroxybenzaldehyde	0	0	0	0	0	0	0	0	0	0	0	0	0	0	0	0	0	0	0	0	0	0	0	0	0	0	0	0	0	0	7958	7364	8074	3871	3594	3960	4196	4245	4598	8335	7744	7894	4857	5770	5181
4-Hydroxyquinoline	261.3	273.5	247.9	2848	2275	2546	289.8	373.3	372.8	217.4	258.3	292.9	2478	2627	2766	5342	5228	3802	12780	17740	15810	3972	3116	4356	2926	2570	3443	25160	25930	24030	879.2	737.1	780.9	848.5	809	896	4199	4372	4445	5097	4810	4699	544.6	719.6	556.3
6-Methylcoumarin	175.8	668.6	180.1	2406	583.9	1623	0	0	0	3075	2938	2765	0	145.9	177.6	2902	2910	2950	2938	2967	3176	3436	2827	3795	3803	3992	4085	1761	1766	1655	158.8	0	0	0	0	0	0	0	182.2	0	0	0	428.5	620.1	449.2
Adenine, 7H-purin-6-amine	0	112.3	0	1064	843.1	486.1	480.4	526.1	523	0	0	0	0	0	0	2883	2960	3943	7259	6322	9481	6264	7241	12670	5834	3526	4153	2095	2162	1881	2164	2186	2606	30660	28930	30550	2350	2286	2428	1691	1706	1601	2077	2228	2043
Aloesin	18490	19970	15020	0	0	0	747.1	804.2	973.2	0	0	0	0	0	0	9590	9921	9999	0	0	0	1816	1472	2643	1014	337.8	709.5	0	0	0	0	0	0	0	0	0	0	0	0	0	0	0	0	0	0
Aloin A	2130	2917	2657	0	0	0	128.4	153.6	127.6	0	0	0	0	0	0	2030	2039	1976	0	0	0	251.4	345.4	447.7	133.6	0	0	0	0	0	0	0	0	0	0	0	0	0	0	0	0	0	0	0	0
Apigenin 6,8-digalactoside	0	0	0	0	0	0	0	0	0	0	0	0	0	0	0	6917	7341	7199	8282	9356	12530	11900	6706	13520	5575	4107	7258	11550	11020	7422	4192	3796	3948	9050	8555	8801	7138	6851	6434	6400	6117	6125	1488	1426	1400
Apigenin	89160	82050	73130	90520	100500	88810	71870	73900	72500	31700	34410	41190	93930	95800	77790	44770	43960	44970	49690	50600	50130	40620	38560	43670	51540	53090	52140	52940	55320	52120	0	0	0	0	0	0	0	0	0	1041	1061	1054	0	0	0
Apomorphine	2102	2877	2035	370.9	372.5	342	258.5	347.3	355	0	0	0	677.9	690.6	650.4	13790	14440	14620	4233	5580	5537	6089	4322	6425	3881	2750	3568	4871	4963	4445	870.3	988.2	888.2	0	0	0	0	183.2	210.2	0	0	0	0	0	0
Arginine	0	0	206	0	0	0	0	0	0	0	0	0	0	0	0	449.8	349.3	402.8	205.6	291.3	432.3	0	0	0	780.4	1019	788.9	0	0	0	14700	16170	21590	9571	7601	8781	9447	16140	11700	1566	2947	1491	26730	25630	26330
Argininosuccinic acid	0	0	0	0	0	0	0	0	0	0	0	0	0	0	0	0	0	0	121.4	133.5	227.6	0	0	0	106.7	136.6	124.6	0	0	0	2513	2459	2584	1657	1353	1343	3222	3164	3373	1950	1951	1967	3779	4428	3545
Aurantiamide acetate	0	0	0	0	0	0	0	0	0	0	1193	1518	598.1	0	391.5	0	0	0	0	0	0	0	0	0	0	0	0	536	574.7	677.6	0	0	0	0	0	0	0	0	0	0	0	0	0	0	0
Aurantiamide	1088	1050	886.2	1857	1747	1793	553.8	544.3	539.2	25160	28090	29630	11700	10970	12900	762.7	905.6	918.8	1398	1494	1568	208.3	208.6	252.9	9134	14370	11230	12930	12650	12440	0	0	0	0	0	0	0	0	0	1083	996.2	1155	991.2	1147	991.5
Benzaldehyde	0	0	0	0	0	0	0	0	0	0	0	0	0	0	0	201.6	482.5	592.4	170	317.3	485.6	192.4	0	225.4	355.8	546.9	592.7	1347	1267	1252	2574	2387	2570	1605	1494	1510	1524	1602	1518	3191	3161	3250	1444	1537	1421
Berberine	283.6	432.6	639.4	130.8	249.8	407.9	742.9	600.7	684.6	651.1	762	519.7	595.5	497.8	421.4	1987	2278	1973	2632	2551	2876	11230	10460	14100	8139	5352	6952	2208	2482	1977	0	0	0	266	264	299.8	0	0	0	0	0	0	0	0	0
Betaine	5306	7357	5059	1293	884.8	737	537.1	269.9	221.2	870.6	1478	2117	1065	1158	1329	43890	42270	43280	48050	47070	48880	59850	52260	34440	30790	55570	32050	45330	47890	46250	36090	38540	36770	39880	39790	38830	30050	32220	32710	22120	20620	20760	31680	31990	32850
C17-Sphinganine	0	269.5	263.3	337.7	397	444.6	327.2	372.2	404	584.9	422.7	548.8	299.7	346.3	342.2	198.1	260.1	381	462.7	483.3	486.8	457.6	506.7	413.9	508.3	500.6	495.5	381.7	454.6	465.5	573	555.5	813.4	561.9	747.7	588.2	624.5	749.6	731.6	605.3	603.1	511.4	656.2	659.2	682.6
Caffeate	4516	5862	2898	19500	17650	17330	13390	13900	14720	2299	2047	2361	5496	7789	3805	5384	5496	5427	8565	9275	9268	10770	9376	11540	8206	6639	7518	6992	6788	6415	0	0	0	0	0	0	0	0	0	0	0	0	0	0	0
Carveol	877.4	971.8	1022	941	1194	1083	1308	1128	1456	525.8	675.7	749.2	4275	4326	4660	2363	899.3	2496	661.3	918.1	688.2	1186	950.9	1140	897.2	858.4	928.1	2884	2977	4289	0	0	0	0	0	0	0	0	0	343.5	291	283.8	0	174	0
Choline	1462	3595	2218	3000	1557	4669	820.5	769.4	635.8	2653	1384	2843	660	381.6	623.1	15670	17480	15220	20210	20750	24000	34150	45480	46380	18490	18280	18170	28740	25870	26280	42490	39300	36980	39390	38810	37580	45780	42490	45990	26950	24980	22840	39780	45200	45840
Chrysin dimethyl ether	14160	12740	10570	1752	1588	1579	3371	3637	3721	0	0	0	16780	16470	18250	9347	8986	9423	1179	1313	1222	2374	2044	2769	1419	721.8	1122	15270	15550	14030	0	0	0	0	0	0	0	0	0	0	0	0	0	0	0
Coclaurine	190.5	254.8	144.6	0	0	0	240.1	187.2	346.7	0	0	0	0	0	0	1311	1312	1370	1890	2231	2126	5835	4681	5527	4850	3490	3702	3304	2415	2163	0	0	0	275.6	295.2	282.7	465.4	343.9	463.3	0	0	0	375.4	650.2	562
Coniferaldehyde	5175	4759	3462	1380	2174	1158	4102	3977	4095	4086	4069	6402	2993	3320	3665	861.3	954.2	933.5	693	695.2	723.1	778.8	628.4	554.3	1457	1941	1659	961	1106	1007	293.7	275.6	277.5	0	0	0	0	0	0	0	0	0	368.5	550	363.9
Corypalmine	4777	6160	4647	7842	5974	6063	6310	6038	6570	6993	7863	9611	2492	2853	2682	6890	8227	8822	3706	3825	3752	8064	3123	2786	7964	10720	9557	6831	4050	3911	0	0	0	0	0	0	230.1	0	221.8	0	0	0	2059	2116	2138
Coumarin	1542	1669	1423	2267	2026	2365	2990	3078	3122	994.5	372.4	1329	1653	1973	1754	546.5	549.6	617.6	905.3	859.9	932	1516	1364	1573	1274	950.6	1193	884.8	1089	824.1	0	0	0	0	0	0	0	0	0	0	0	0	0	0	0
Coumaroyl tyramine	38920	29830	26170	30700	37100	26550	21580	22000	23330	69610	69130	51460	53950	55950	40640	52950	51770	52400	49090	49560	49940	45240	42110	47760	52830	56480	55120	52810	53790	52590	0	0	0	0	0	0	210.9	163.9	165.4	147	0	163.2	1104	1189	1075
Cuminyl alcohol	4894	5869	4474	6080	6002	5310	9349	7607	6619	4427	2082	2131	6706	4037	3606	680.2	789.6	554.3	1232	1131	1220	1458	1242	1299	1772	2118	2162	2166	2183	1974	0	0	0	208.3	0	0	0	202.4	181.2	369.9	374.8	182.3	498.3	507.7	486.2
Cyclo(VVFF)	3606	2946	2752	2270	2293	2410	1024	1164	909.3	694.2	702.3	575	1509	1559	1644	2669	3177	3470	1924	2267	2125	659.6	722.3	769.1	669.6	638.2	666.9	1394	1266	1536	0	0	0	0	0	0	0	0	0	0	0	0	0	0	0
Cytosine	0	0	0	0	0	0	0	0	0	0	0	0	0	0	0	0	0	0	0	0	0	0	0	0	0	0	0	0	0	0	15340	12760	13340	5201	4987	5012	3050	3132	3327	1436	1624	1638	3440	3725	3577
Dehydrosalsolidine	0	300.8	227	222.6	204.1	0	0	0	0	0	0	0	0	0	0	18940	19890	18380	12770	13910	16530	10280	7424	12880	4843	2710	3897	19940	18870	17520	22790	25320	27320	18760	16330	17900	22190	23930	21570	21280	19250	19890	1120	1233	1028
Demethoxycurcumin	2804	2247	1829	0	0	0	2500	2661	2697	0	0	0	11660	11590	12440	1511	1499	1553	0	0	0	1478	1198	1758	1001	506.5	840.6	9086	8955	7783	0	0	0	0	0	0	0	0	0	0	0	0	0	0	0
Dopamine	0	0	0	194.7	0	0	0	0	0	0	0	704.8	986.8	999.5	0	2398	2417	2498	2275	1680	2704	0	1505	1908	2893	3397	3433	984.3	1312	1696	1872	2396	1124	751.8	923.3	727.7	1420	2967	1336	602.5	813.7	477.6	3271	2835	3706
Eriodictyol	5256	5186	5158	2770	2703	2884	0	0	0	16810	15850	14860	3294	3402	3572	3105	3166	3239	2078	2139	2208	0	0	0	5350	7834	6680	2162	2158	2233	0	0	0	0	0	0	0	0	0	0	0	0	166.4	262.8	164.9
FA 18:3+1O	13750	12390	11080	4119	4592	4276	6121	6968	5761	3131	3213	2909	5512	5212	5939	7947	7692	8140	2199	2264	2458	4151	3947	4050	4095	3780	3622	1728	1871	1763	0	0	0	0	0	0	0	0	0	0	0	0	0	0	0
Ferulic acid	1559	2187	1690	1359	1222	1187	809.9	664.6	689.5	3441	3270	5478	3171	2123	2458	1302	1237	1348	1401	1419	1412	495.4	408.2	629.2	1766	2500	2178	1902	2078	2001	193.6	224.9	198.5	0	0	0	187.1	0	0	482.5	262.8	376.5	611.4	662.1	455.6
Feruloyl dehydrotyramine (isomer of 1655)	32020	30150	23540	55680	50470	45000	29000	30760	31340	22060	17860	27970	34350	37210	39420	9474	9782	9723	13080	13610	14410	12530	10580	15470	14490	14660	14720	19360	19830	18280	0	0	0	222.3	0	199.1	256.7	239.8	246.4	260.9	281.7	262.2	274.8	306.3	210.3
Feruloyl O-methyldopamine	7550	8297	6437	5353	3495	4309	5115	5397	5797	13630	12760	16270	5696	6153	6168	12720	12520	12320	7493	7839	8316	7472	6129	6849	13190	17800	15980	12750	12660	12800	334.4	335.5	281.7	209.8	251.2	218.7	226.9	0	248.6	307.5	344.8	362.5	551.4	736.7	639.1
Glutamic acid, 2-aminopentanedioic acid	0	0	0	0	0	0	0	0	0	0	0	0	0	0	0	0	0	0	0	0	0	0	0	0	180.4	413.8	218	0	0	0	642.9	645.6	646	1457	1415	1471	0	0	122.1	5112	4861	5202	2509	2767	2461
Glutathione oxidized	0	0	0	0	0	0	0	0	0	0	0	0	0	0	0	0	0	0	0	0	0	0	0	0	0	0	0	0	0	0	185	202.4	203.2	0	0	0	187.8	0	189.3	0	0	0	1664	1864	1719
Grossamide	17780	15490	13560	13480	10990	11520	6446	8734	8886	10700	11650	14260	14490	16280	16170	8935	8950	9063	5430	5754	5818	4007	3803	4767	6200	12050	7596	8317	10110	8036	0	0	0	0	0	0	0	0	0	0	0	0	0	0	0
Guanine	0	0	0	0	0	0	0	0	0	0	0	0	0	0	0	659.7	845.2	805.2	1213	1439	1373	899.3	523.8	1038	1150	1173	1306	264.5	232.3	176.8	19450	18450	16370	29980	29280	26480	28600	30180	30660	34790	34350	33730	34460	15520	33940
Heliamine	0	0	0	0	220.4	0	0	0	0	0	0	0	0	0	0	4165	4075	4223	6652	7254	7347	3264	2689	3645	2804	2391	2710	5595	5654	4975	7094	7242	7195	10890	10030	10380	21630	18730	22270	6739	6317	6221	5806	6982	5950
Hesperetin	6866	6287	5860	3791	3565	3509	0	0	0	11330	10450	10270	3932	3805	4014	3570	3710	3653	2438	2562	2653	0	0	0	5187	7388	6445	2750	2777	2732	0	0	0	0	0	0	0	0	0	0	0	0	0	0	0
Hypoxanthine	0	0	0	0	0	0	0	0	0	0	0	0	0	0	0	0	190.2	196.1	0	0	0	358.8	0	359.3	0	0	0	835	855.4	718.1	4497	4058	4469	2563	2651	2676	1384	1396	1478	6108	5786	6113	813.1	811.3	836.5
Isoboldine	2417	3796	2636	4085	2862	2819	5230	4619	5637	4187	4005	5014	988.8	1241	1231	14340	13770	15490	14880	16020	16510	21770	16260	21670	15160	13750	14360	24260	20400	19380	6035	6619	6291	6435	6251	6116	10810	10470	10390	5477	5686	5434	11590	11620	10810
Isonicotinic acid	1914	3529	3031	5377	5132	6094	6730	5522	5718	4916	5124	8255	7187	6188	6038	4396	5330	5505	5016	4170	4903	5622	5202	4864	5988	5945	6799	7275	6762	6930	5392	5406	5577	3511	3325	2777	2078	2595	2590	8341	7275	7715	3860	4510	3993
Isoorientin	0	0	0	0	0	0	0	0	0	0	0	0	0	0	0	247.3	254	247.9	1266	2538	2523	4928	4345	4059	2227	1771	2153	2336	2060	3826	0	0	0	0	0	0	0	0	0	0	0	0	0	0	0
Isoschaftoside	0	0	0	147.6	0	0	0	0	0	0	0	0	0	0	0	21120	22070	22220	49920	50000	52060	52600	44420	60870	32140	19050	26020	34170	35550	31550	7988	7394	7788	16220	21470	17060	14460	14820	15420	11940	11380	15110	520	520.3	495.9
Isovitexin	0	0	0	1500	1107	1020	1233	1217	1328	0	0	128.1	500.8	420.6	420.5	2540	2673	2702	6579	7184	7407	12530	10290	14050	9473	6503	8242	5177	5313	4761	0	0	0	306.6	335.8	335.8	192.4	191.6	234.2	0	0	0	0	0	0
L-Carnitine	0	0	0	0	0	0	0	0	0	0	0	0	0	0	0	2874	3089	2990	1491	1469	1666	1565	1255	1672	1192	1217	1300	1713	1532	1314	4816	4723	4691	3678	3720	3616	3032	3033	3140	5544	5532	5918	1993	1985	2076
Linderalactone	14430	11610	10920	0	0	0	505.3	584.4	546.6	0	0	0	0	0	0	20940	21570	22210	0	0	0	1164	1030	1476	786.4	517.6	662.3	180	305.4	183.4	0	0	263.6	0	0	0	0	0	0	0	0	0	0	0	0
Linoleic acid	1468	1529	1397	4886	5060	5665	2069	2300	1953	4310	4691	4235	4580	4416	4868	1222	1249	1178	4202	4794	4925	1596	1667	1573	2605	2987	2769	4929	5247	5000	0	0	0	0	0	0	0	0	0	430.8	347.8	404.8	0	0	0
Loliolide	18980	20290	19160	31950	28190	29880	29590	28740	29380	23130	22070	24330	24200	24300	26460	5769	5844	5542	13510	12780	13240	13330	12190	12840	14220	16110	14850	15300	15820	15420	898.4	825.1	921.6	1987	1589	2017	2881	2865	2873	2924	2790	2893	5115	5539	5065
LPC 18:2	0	0	0	0	0	0	0	0	0	0	0	0	0	0	0	17080	18060	19070	3543	4047	4261	1870	1611	2234	5809	7447	6442	4276	4136	3862	0	0	0	0	0	0	0	0	0	0	0	0	0	0	0
Lysicamine	9545	0	0	4146	3315	0	561.9	299.7	2533	0	0	0	0	7457	7766	11770	12260	12320	5617	6114	6403	7801	6390	11820	7335	5240	6683	12590	12540	11920	0	0	0	0	0	0	0	0	0	0	239.8	0	0	0	0
Matairesinol	3140	1080	1111	536.9	609	664.7	727.9	582.1	629.5	751.6	1050	567.8	336	351.3	848.6	2373	2327	2788	724.3	748.9	770.6	878.7	826.7	865.2	781.5	2437	831.3	686.3	583.4	568.5	329.2	277.7	285.7	0	0	0	187.6	190.1	191.4	185.7	212.3	0	808.8	837.8	685.3
Methyl trans-cinnamic acid	6913	4467	3924	5497	2908	5221	6423	6533	6832	540.4	575.5	575.4	2317	3479	2757	2902	3022	2829	2719	2916	2987	3942	3605	4341	2863	2088	2348	2640	2759	2560	760.7	918.9	909.8	977.3	958	1036	815.1	778.9	943.8	626.2	622.3	592.8	788.5	693.1	658.9
Naringenin chalcone	76860	67870	66250	46590	49200	45370	2058	3416	3288	81490	81160	83710	42000	42090	44230	31120	30930	31610	27100	27990	28820	1304	1204	1372	29950	33760	31370	24560	24700	23870	181.3	0	0	0	0	0	0	0	0	0	0	0	693.4	573.3	712
N-Fructosyl isoleucine	0	0	0	0	0	0	0	0	0	0	0	0	0	0	0	1640	1816	2378	2631	3034	3480	6582	3716	6556	7833	8928	8339	0	0	0	23150	22460	23480	43650	40070	42610	23420	22860	24550	3986	3751	3758	50460	55290	50570
N-Fructosyl phenylalanine	0	0	0	0	0	0	0	0	0	0	0	0	0	0	0	0	0	0	0	0	0	0	0	0	0	0	0	0	0	0	1666	1627	1662	2238	2238	1526	1443	1458	1575	149.7	158.5	0	3050	3454	3116
Nicotinic acid	822.4	1216	1031	3466	3564	2964	3066	2351	2663	2673	2665	3408	2440	2630	2711	14380	15130	15320	15360	15960	16880	18700	16390	18890	20480	21010	21650	18240	18580	17200	10000	8979	9424	11620	11100	9689	8693	8584	8503	13850	13290	13530	10660	10140	10330
N-methylcorydaldine	47910	48030	42190	41030	40600	37240	41510	42020	43760	399	222.7	340	60290	60850	63070	19270	19260	19570	19770	19980	20720	17930	16710	18700	12610	7830	10350	32820	33540	32860	2082	2214	1977	1623	1748	1703	2848	2954	3017	3761	3854	3964	0	0	0
Nootkatone	3926	3846	3496	805.5	963	1025	2138	2028	1755	1430	1588	1156	349.1	319.8	236.7	3180	3034	3072	788.4	822.9	830	1477	1681	1405	1424	1275	1259	386.3	347.5	358.9	372.3	197.1	297	0	0	0	0	0	0	0	0	0	0	0	0
Norephedrine	167.9	166.9	0	426.4	239.6	408.2	0	0	0	6954	7630	8195	3025	2998	3535	146.9	0	0	228.6	422.5	440.7	0	0	0	2571	3901	3066	3479	3551	3159	0	0	0	0	0	0	0	0	0	213.8	289.2	241.2	297.3	223.5	304
O-methylarmepavine	0	0	0	0	0	0	0	0	0	0	0	0	0	0	0	3653	4700	4640	3000	4379	4314	2376	1927	2999	7969	9630	8115	7769	5830	5084	220.1	0	0	0	0	0	313.3	260.9	259.9	298.9	0	0	2152	2489	2100
Palmatine	1215	1897	1327	1288	944.5	915	588.3	532	551.2	280.4	325.5	433.8	769.3	880.2	820.1	24550	25030	32640	25060	32050	34140	31100	19750	33610	23210	25800	30920	33030	33190	33800	18890	15350	17000	15980	13180	15330	15930	18920	17180	25240	24010	24500	5488	5596	5033
P-anisaldehyde	0	825.4	0	938	0	1032	676.4	0	0	546.1	841.9	1245	0	1396	1315	2589	2629	2999	2386	2216	2267	1721	1317	1695	3638	3720	3395	1926	2213	2086	771.7	787.6	1010	904.3	615.3	1042	1499	1622	1829	458	264.5	459.8	2355	2011	2157
Phlorizin	8407	23200	13220	0	0	0	1409	1850	1690	0	0	0	0	0	0	516.9	544.8	652.7	0	0	0	0	0	0	0	0	0	0	0	0	0	0	0	0	0	0	0	0	0	0	0	0	0	0	0
Pipecolic acid	0	0	0	0	0	0	0	0	0	0	0	0	0	0	0	3416	3120	2927	4920	5006	5274	4247	3307	3524	2642	2307	3161	500.5	509.2	432.3	11650	11770	11910	17170	16680	15970	19330	18320	18690	3245	3395	3470	7739	8398	7971
Piperine	38220	34540	30840	6001	4783	5082	80640	75500	71330	549.1	268.1	410.6	6566	6586	6935	60970	65370	62510	4055	4332	4309	57700	55380	56490	52520	39270	46110	5342	5309	5046	1164	884.6	1113	1017	707	917	0	0	0	0	0	0	0	0	0
Proline	0	0	0	0	0	0	0	0	0	0	0	0	0	0	0	0	0	0	0	0	0	0	0	0	0	0	0	0	0	0	4899	4283	4721	1040	1030	1188	682.5	343.6	727.9	2966	2863	2897	486	719.1	589.8
Proline betaine	526.1	1718	961.3	0	79.98	0	0	0	0	0	0	0	0	0	0	81260	82860	84060	35890	34780	36870	20950	18710	20970	21370	21940	19830	53310	44340	46450	41570	40300	26940	25510	25050	24050	38670	37700	37320	21020	18620	17970	21150	21940	23010
Pyridoxine	0	0	0	0	0	0	0	0	0	0	0	0	0	0	0	1721	1837	1758	747.6	1034	754.9	1411	1178	1362	1386	1527	1692	829.5	891.5	857.9	7926	7424	7779	4809	4257	4500	3561	3746	3712	1830	1856	1847	6224	7431	6214
Pyroglutamic acid	0	0	0	0	0	0	0	0	0	0	0	246.5	0	0	0	3619	3904	4081	10570	11680	12490	7554	6093	7961	13710	16560	15700	744.8	800.8	943.9	37820	33090	33880	34350	33760	32880	58250	70060	72210	45080	45030	45690	39600	41430	38640
Reticuline	15780	23940	20320	29550	29520	25600	21370	22160	22570	12600	12630	14120	10990	12060	11950	269.1	382	304.4	512.4	561.4	551.9	326.8	369.1	524.4	872.8	971.4	1043	220.7	228.1	218.6	0	0	0	0	0	0	0	0	0	0	0	0	0	0	0
Reticuline N-oxide	639.2	1352	921.8	532.7	429.3	423.6	407.1	410	472.8	767.8	838.8	1080	642.6	749.9	765.7	4240	4437	4285	3182	3418	3639	5486	4166	5514	3896	3206	3427	6782	7106	7135	1007	1198	1048	560	569	518.4	596.5	868.3	784.8	2155	2173	1769	731.1	830.7	674.8
Rosmarinic acid	0	0	0	0	0	0	0	0	0	0	0	0	0	0	0	0	0	0	0	0	0	0	0	0	0	0	0	1869	2041	1576	0	0	0	0	0	0	213.4	0	0	2663	2555	2437	0	0	0
Salsoline	0	0	0	0	0	0	0	0	0	0	0	0	0	0	0	4247	4349	4706	5582	6247	6000	5360	4898	6438	3758	2598	3133	4491	4061	4023	12530	12000	11980	14160	11720	13680	15480	17490	17190	6484	6759	6116	6190	7015	5989
Scoparin	0	0	0	168	0	0	0	0	0	0	0	276.5	0	0	0	537.9	565	583.7	734.1	750.7	875.4	575.1	364.8	474.4	1019	1333	1128	798.9	845.5	742.9	0	0	0	0	0	0	0	0	0	0	0	0	0	0	0
Scopoletin	2293	2855	1562	1325	925.9	869.7	1461	1605	1676	2161	2189	2394	1873	1777	1939	1046	1053	989.9	789.3	815.2	885.5	994.3	939.9	1199	1592	1879	1745	1571	1652	1507	0	0	0	0	0	0	0	0	0	0	0	0	240.2	215.9	230.4
Syringaldehyde	1407	2451	1617	2603	1496	1455	2201	2594	2957	1584	1985	2201	1296	1378	1272	1312	1377	1495	1652	1796	1914	1849	1669	1915	2338	2743	2576	1675	1789	1729	0	0	0	0	0	0	179.7	192.3	0	0	0	0	415.6	415.6	391
Syringin	0	0	0	2317	0	0	0	0	0	4201	0	0	0	0	0	96490	93620	95420	4727	3181	2655	22030	12190	0	15280	8108	11180	949	1288	1306	0	0	0	0	0	0	0	0	0	0	0	0	0	0	0
Tangeritin	1611	1218	906.4	629.3	475.8	470.2	2632	2744	2817	0	0	0	0	0	0	721.2	861.8	877.6	268.7	441.8	429.6	1653	1363	2070	1124	602.9	789.5	0	0	0	0	0	0	0	0	0	0	0	0	0	0	0	0	0	0
Tetrahydropalmatin	15970	19930	15360	28080	21790	21430	22170	21760	24560	6503	6571	7601	21900	23820	23470	51160	76730	52510	85410	93640	92420	83390	55770	88730	47820	35310	42450	36310	50150	46480	0	0	0	3574	3377	3378	5746	5923	6029	1486	1303	1642	704.8	779.9	513.4
Trans-Cinnamaldehyde	1003	1764	877.6	1101	1044	1976	3075	2254	2159	176.5	293.2	173.8	648.5	574.6	691.1	1329	1349	1391	1345	1392	1450	1977	1708	1970	1555	1174	1296	1351	1384	1300	228.1	180.3	188.7	312.2	490.9	488.8	378	253.1	369	343.4	180.8	176.4	354.7	367.4	353.5
TRANS-CINNAMATE	0	0	0	304.5	158.2	153.9	0	0	0	0	0	0	0	0	0	1121	613.3	1084	895.1	3209	3352	692.1	795.4	812.4	3825	4239	4165	293.1	164.9	146.7	461.9	373.7	446.8	662.2	607.3	598	651.4	683.4	580.9	0	0	174.3	835.7	913.5	858.3
Trans-Ferulic acid	28230	37040	22160	35270	19040	30480	14410	14430	18580	45380	53530	71040	53430	51170	56980	18390	18500	18740	19850	20310	20730	9187	8238	9788	25230	34350	29930	27780	28680	26470	3507	3516	3226	814	871.2	829.8	2746	2625	2676	5668	4900	5229	8748	9671	8740
TRIGONELLINE	0	0	0	575.4	617.6	587.1	163.3	486.6	256.8	179.3	234.8	194.4	465.1	525.6	552.5	2118	2232	2253	3575	3369	3641	3786	3401	3497	2979	2587	2772	2751	2538	2634	8514	8393	8506	14980	14870	14930	13000	12460	12230	11370	10710	10920	6866	6567	6947
Tyramine	2777	2988	1526	3353	2378	3198	4644	4757	5941	5969	5011	6522	1503	1796	2410	3671	4258	4049	7500	7244	8166	8378	7327	10260	5964	5603	6221	5335	5692	4090	15980	15220	16340	26900	24260	24050	22890	23220	23590	9517	9246	9571	23990	25090	22250
Tyrosine	0	0	0	0	0	0	0	0	0	0	0	0	0	0	0	0	0	0	1075	1021	511.5	201.1	0	208.9	889.1	897.9	803.4	0	0	0	3596	3326	3597	2641	2511	2857	3137	3653	3570	4145	3895	3951	3232	3775	3435
Uracil	0	0	0	0	0	0	0	0	0	0	0	0	0	0	0	1220	1254	1250	1322	1467	1708	1671	1129	1718	1506	1861	1574	1334	1271	1093	14940	14280	14700	11330	10430	10400	10830	10710	11760	8341	7839	7880	9237	10970	9657
Vanillin	35400	40660	34900	29370	28210	25660	33070	32520	34440	37180	37940	46920	34660	35790	37740	18220	18430	18340	17270	17490	18290	15270	14100	16660	22290	26540	24990	24620	25230	24410	1394	1337	1332	1381	1308	1377	2162	2239	2296	2371	2276	2335	3383	3868	3626
Xanthine	0	0	0	0	0	0	0	0	0	0	0	0	0	0	0	0	0	0	0	0	0	0	0	0	0	0	0	0	0	0	3104	3043	3148	2819	2688	2923	1164	1168	1189	5736	5824	6173	737.1	824.7	725.4
Zapotin	795.2	630.7	366	131.5	0	0	0	118	116	0	0	0	1831	1832	2057	287.5	310.7	407.4	0	0	0	0	0	0	0	0	0	1552	1609	1323	0	0	0	0	0	0	0	0	0	0	0	0	0	0	0

## Sheet: 51-Median__Neg
		EA-A1	EA-A2	EA-A3	EA-B1	EA-B2	EA-B3	EA-C1	EA-C2	EA-C3	EA-D1	EA-D2	EA-D3	EA-E1	EA-E2	EA-E3	EtOH-A1	EtOH-A2	EtOH-A3	EtOH-B1	EtOH-B2	EtOH-B3	EtOH-C1	EtOH-C2	EtOH-C3	EtOH-D1	EtOH-D2	EtOH-D3	EtOH-E1	EtOH-E2	EtOH-E3	H2O-A1	H2O-A2	H2O-A3	H2O-B1	H2O-B2	H2O-B3	H2O-C1	H2O-C2	H2O-C3	H2O-D1	H2O-D2	H2O-D3	H2O-E1	H2O-E2	H2O-E3
		EA	EA	EA	EA	EA	EA	EA	EA	EA	EA	EA	EA	EA	EA	EA	EtOH	EtOH	EtOH	EtOH	EtOH	EtOH	EtOH	EtOH	EtOH	EtOH	EtOH	EtOH	EtOH	EtOH	EtOH	H2O	H2O	H2O	H2O	H2O	H2O	H2O	H2O	H2O	H2O	H2O	H2O	H2O	H2O	H2O
	Sayaendoside	0	0	0	0	0	0	0	0	0	127.1	148	265	0	0	0	2291	2334	2380	1193	1171	1195	2006	2007	2469	2406	6209	6078	797.8	764.2	617.6	3038	3077	3227	2246	2302	2256	1503	1500	1537	732.5	706.2	765.4	5684	5707	5597
	(Z)-5,8,11-trihydroxyoctadec-9-enoic acid	94580	88480	81580	94880	95820	98210	96900	100000	98470	111800	106800	113600	48800	46420	50360	71880	69910	72500	89690	91380	92850	72920	70810	67680	90610	98790	93780	60520	61110	62320	35330	36680	38650	35450	34230	36370	48280	51940	56190	58350	57780	57560	57760	62680	58550
	3-Hydroxy-3-methylglutaric acid	0	0	0	0	0	0	0	0	0	0	0	0	0	0	0	0	0	0	0	0	0	0	0	0	0	0	0	0	0	0	1399	1329	1613	1525	1610	1642	1439	1553	1612	2143	2382	2140	718.6	916.8	705.7
	3-Methyladipic acid	245.2	437.8	359.2	2010	1551	1474	5521	5372	5322	1319	1411	1560	9319	9642	9407	798.3	923.2	788.9	2261	3503	3552	4440	3855	4914	4438	4579	4244	7635	7876	6934	220.2	290.5	321.7	1344	1334	1315	1340	1375	1457	2462	2623	2535	1104	1187	1141
	3-Methylbenzoic acid	172.2	194	179.1	240.5	252.9	0	417.2	294.8	237.4	631.8	661.8	727.8	249.8	186.6	183.5	563.5	556.7	684.1	825.6	1105	1178	1015	548.3	1034	2028	3757	2234	1557	1622	1349	0	163.9	194.8	201.2	0	0	223.2	209.2	224.7	168.5	193.4	172.9	415.7	585.6	412.7
	3-Methylcatechol	544.4	819.2	504.1	1099	1041	837	434.6	568	621.1	3201	3312	3693	296.8	323.4	287	11680	10530	11530	7436	3357	7731	3938	2813	4303	14830	22660	18780	6360	6309	5792	697.5	677.2	705.8	1643	1692	1541	3875	4466	4477	884.8	642.6	687.9	6420	6825	5993
	4-Acetamidobutanote	0	0	0	0	0	0	0	0	0	0	0	0	0	0	0	0	0	0	0	0	0	0	248.7	0	2110	2762	0	0	0	0	876.7	1213	1338	3012	3052	3394	253.7	376.8	349.5	12530	7517	13180	6016	6474	6496
	5,7-dihydroxy-2-(4-hydroxy-3-methoxyphenyl)-2,3-dihydrochromen-4-one	30210	26040	26540	12760	13000	12210	0	139.8	0	66060	62900	65470	17240	17080	17650	10450	10920	11080	6826	7087	6931	0	0	0	13850	21370	17710	7770	7875	7599	0	0	0	0	0	0	0	0	0	0	0	0	242.3	266.3	319.5	Homoeriodictyol (+/-)-
	9-(2,3-dihydroxypropoxy)-9-oxononanoic acid	3864	4854	4020	17790	16520	15680	14850	14190	15070	7186	7345	7060	23530	24000	13950	7018	6880	6970	13730	13650	15070	13380	10970	15740	13160	13420	13210	32700	33550	30820	1332	1368	1343	4021	3848	3830	2159	1987	2237	10500	10860	10700	2128	2268	2152
	Aloesin	68130	82770	56560	0	0	0	7420	8292	7254	0	0	0	0	0	0	44730	30300	46380	1189	757.5	803.2	91910	79900	120600	59450	34840	51920	506.1	521.4	292.3	34870	36670	34630	17910	20300	16740	0	0	0	183.7	0	0	0	0	0
	Apigenin	83420	81270	80030	96560	98530	94090	60330	61140	60780	88180	83150	80490	104200	102600	104000	46290	45680	44610	51670	51750	50350	41330	41170	41380	49900	54680	51480	52600	52210	50590	0	0	0	0	0	0	0	0	0	689.5	742.3	703.5	0	0	0
	Azelaic acid	72700	77720	74030	111500	111900	110700	156500	154500	154100	135000	137400	143500	26600	33570	262600	40030	40220	40310	60610	60290	60190	63550	62770	63590	62370	64090	61470	33150	36670	26330	15150	15470	17350	35670	34160	35580	38960	39650	40510	46330	45240	48580	35020	35560	36880
	Bisdemethoxycurcumin	1905	870.8	1001	0	0	0	1764	1865	1511	0	0	0	4097	4040	5147	989.4	1115	1046	0	0	0	1114	1133	1323	504.6	250.2	446.8	3913	3767	3498	0	0	0	0	0	0	0	0	0	0	0	0	0	0	0
	cis-Aconitic acid	0	0	0	0	0	0	0	0	0	0	0	0	0	0	0	0	0	0	0	0	0	0	0	0	0	0	0	0	0	0	644.6	801.5	886.6	776.3	845.4	873.8	1039	915.6	953	701.2	897.4	842.2	672	804	721.3
	Citramalic acid	0	0	0	0	0	0	0	0	0	0	0	0	0	0	0	0	0	0	0	0	0	0	0	0	0	0	0	0	0	0	2548	2857	3065	2820	2780	2857	3085	3093	6118	3180	2991	3254	2624	2650	2697
	Citrate	0	0	0	0	0	0	0	0	0	0	0	0	0	0	0	0	0	0	0	0	0	0	0	0	0	0	0	0	0	0	11070	10510	7412	14350	13690	14050	11930	12500	12940	8913	8988	8437	9180	9684	14480
	Citric acid	0	0	0	0	0	0	0	0	0	0	0	0	0	0	0	0	0	0	0	0	0	0	0	0	0	0	0	0	0	0	35900	44070	43700	74140	75070	41940	47400	82030	85420	43310	73780	44010	72150	75410	74270
	Coumaroyl + C6H9O8	0	0	0	0	0	0	0	0	0	0	0	0	0	0	0	0	0	0	0	0	0	0	0	0	0	0	0	0	0	0	478.4	514.8	530.6	0	0	0	0	0	0	0	0	0	2012	2277	1957
	Curcumin	2613	1870	1874	0	0	0	2545	3019	2562	0	0	0	9201	9138	8978	1672	1535	1865	0	0	0	1858	1662	2316	1145	638.1	876.6	6131	6325	6360	0	0	0	0	0	0	0	0	0	0	0	0	0	0	0
	D-(+)-Malic acid	0	0	0	0	0	0	0	0	0	0	0	0	0	0	0	1417	0	0	0	7386	7189	3198	0	0	0	0	0	0	0	0	11280	10370	22930	16820	18690	20530	18930	20550	27980	6987	4865	7108	23970	19200	22500
	D-(+)-Trehalose	0	0	0	0	0	0	0	0	0	0	0	0	0	0	0	0	0	0	0	0	0	0	0	0	0	0	0	0	0	0	0	0	0	0	0	0	0	0	0	0	0	0	0	0	0
	Demethoxycurcumin	1589	1143	969.4	0	0	0	1418	1364	1417	0	0	0	4885	4462	4672	1419	1381	1501	0	0	0	1285	1250	1813	607.3	243.6	370.5	4563	4681	4243	0	0	0	0	0	0	0	0	0	0	0	0	0	0	0
	D-FRUCTOSE	0	0	0	0	0	0	877.9	801.7	586.1	0	0	0	0	0	0	1382	1229	1289	1377	1712	1634	1811	1328	1642	893.8	859.8	916.6	723.7	480.3	442.5	9606	9432	9356	9657	10310	9806	14060	15010	17210	8509	9552	9584	8926	9721	9443
	D-Glucuronic acid	0	0	0	0	0	0	0	0	0	0	0	0	0	0	0	0	0	0	0	0	0	0	0	0	0	0	0	0	0	0	1460	1536	1592	3143	3209	3146	736.4	719.3	620.2	1969	2025	2002	959.8	980.1	1025
	Eriodictyol	35130	32850	52530	30750	32250	18170	383.9	713	429.5	160100	155600	159500	41310	42970	41720	42570	41720	42270	26500	26120	25980	1074	1055	1169	52810	64950	59550	27190	27740	25850	0	0	0	0	0	0	0	0	0	0	0	0	1088	1188	1104
	FA 18:2+1O	84700	80720	79020	66680	70390	71700	68360	71210	60600	46900	42220	28800	42600	43920	43730	68570	69350	68420	60910	62370	61150	64510	66250	64750	64960	62030	63810	42810	42530	44190	0	279.6	196.5	1131	987.3	1084	0	0	0	3378	3653	3429	0	0	0
	FA 18:3+1O	49710	46530	40250	32840	34780	33230	55100	59090	47660	22590	20320	14770	20310	19020	20400	40340	39690	42180	31570	32360	32990	45740	49810	46560	40780	36320	39330	17170	17990	15650	218.1	0	206.5	538.6	584	527.6	0	0	0	1970	2008	1931	0	0	0
	FA 18:4+2O	17530	15010	13690	12270	10390	11450	10860	10990	10520	7832	8252	8341	4160	3987	4551	10260	9704	10490	9832	10020	10250	6414	5887	6415	7269	7694	7901	4257	4389	4168	872.3	951.2	864.9	822.1	656	695.8	721.4	586.8	793.3	3424	3619	3493	582.3	765.8	491
	FA 18:5+2O	25380	17330	15670	15790	15120	14630	8075	8822	7873	8876	8252	8759	3011	2573	3173	12580	11920	12920	12200	12570	12550	5621	5667	6313	8506	8192	8417	4685	5090	4697	593.4	599.8	623.2	0	0	230.3	507.5	391.4	559.8	2835	2419	2683	351	223	301.6
	Ferulic acid	1405	1217	1178	683.5	562	528.7	0	0	0	4786	4312	4788	2115	2278	1996	863.2	915.1	891.9	369.9	465.3	590.6	0	0	0	1209	2117	1624	1394	1433	1300	0	0	0	0	0	0	0	0	0	172.9	137.5	170.4	672.4	822.1	732.7
	Flavanone + 3O	3991	7367	4434	0	0	0	3079	2725	3288	0	0	0	0	0	0	14950	15210	15370	0	0	0	2227	2034	2632	978.8	612.4	779.2	0	0	0	1691	1560	1575	160.2	169.9	173.8	0	0	0	0	0	0	0	0	0
	Gluconate	0	0	0	0	0	0	186.4	202.1	194.9	158.2	0	151.5	0	0	0	1276	1245	1129	1108	1173	1377	2422	1448	1377	1294	1506	1054	257	279.6	237.2	28270	28770	29640	29240	30650	29980	21150	21050	20680	16280	14360	16070	20470	20640	21020
	Glyceric acid	0	0	0	0	0	0	0	0	0	0	0	0	0	0	0	364.4	310.9	335.2	1558	1445	1565	1711	1584	1716	614.1	297.6	626.8	0	0	0	9714	9831	9456	10690	10580	10910	12570	12620	12740	3747	3646	3754	9614	10470	9610
	Guanosine cyclic monophosphate	0	0	0	0	0	0	0	0	0	0	0	0	0	0	0	0	0	0	0	0	0	0	0	0	0	0	0	0	0	0	0	279.6	193.1	7128	7085	6421	1037	1152	992.7	1347	1146	1173	15340	15240	15760
	Kaempferide	8999	7661	7544	4707	4576	4031	608	667.3	606.2	37460	38310	40490	10420	10140	10420	10290	10830	10720	5651	5584	5901	570.6	617.5	639.6	16380	27300	23040	12960	13190	11730	0	0	0	0	0	0	0	0	0	0	0	0	0	0	0
	L-Iditol	0	184.8	152.6	0	0	0	0	0	0	0	0	0	0	0	0	5853	6084	6767	1769	1400	1223	2204	1961	2448	1710	1221	1395	549.7	581.2	563.9	1525	1738	1763	1142	1129	1340	899.5	876.9	1263	511.3	1277	727.2	779	914.8	759
	Luteolin	26670	25570	23980	38870	35130	32440	7098	6982	3721	72440	70160	27760	69780	70260	67420	26000	27240	27330	25920	26700	26500	7734	7073	8251	46260	57650	52590	40880	41480	36420	0	0	0	0	0	0	0	0	0	252.4	181.2	217.9	266.6	307.1	308.7
	Maltotriose	0	0	0	0	0	0	0	0	0	0	0	0	0	0	0	0	0	0	0	0	0	0	0	0	0	0	0	0	0	0	1932	2140	2036	1296	1513	1420	1630	1665	1685	3937	4032	4285	2338	2480	2695
	N-Acetyl-DL-glutamic acid	0	0	0	0	0	0	0	0	0	0	0	0	0	0	0	0	0	0	0	0	227	1336	1001	1902	3743	5256	9023	1079	1077	724.2	1354	2526	2343	5032	5107	6140	809.7	790.6	890.5	22600	13490	23620	11100	12230	11940
	Naringenin	33870	70580	28990	94120	95890	91320	2955	5272	4559	35370	28710	25910	102000	102800	101700	32110	30670	29350	58510	56390	57970	2994	3027	3123	25180	25670	29160	58100	58860	57510	658.3	703.8	730.4	0	0	0	592.9	608.6	495.5	514.2	503.3	466.5	3250	3691	3514
	N-Fructosyl pyroglutamate	0	0	0	0	0	0	0	0	0	0	0	0	0	0	0	0	0	0	0	0	5735	0	0	0	0	0	0	0	0	0	18820	18370	12500	28070	30730	29620	79330	78550	81710	27880	36960	40880	59590	61000	61310
	Norstictic acid	27760	25750	17600	106900	90640	86030	19760	24440	22220	11220	10610	12740	102300	102100	104700	6379	6512	7464	24560	27070	25550	3281	2908	5663	3088	1971	2335	24460	29580	19980	846.5	976.5	1113	0	0	0	185.8	0	203	7168	6793	7662	195.6	190.9	122.5
	Orsellinic acid	554.8	445.5	422.6	313.6	326	213.9	0	0	0	3479	3222	3936	729.5	835.6	913.9	333.4	360.3	218.3	162.7	134	166.8	0	0	0	658.7	1284	1015	520.1	542.9	490.6	0	0	0	0	0	0	0	0	0	0	0	0	0	0	0
	Protocetraric acid	0	0	0	2071	1704	1650	0	0	0	0	0	0	614.8	601.1	646.7	169.9	295.6	196.2	3882	4302	4602	0	0	154.1	0	0	0	3911	4338	2384	182	0	191.6	0	0	0	234.1	281.4	286.1	2056	1886	2041	0	0	0
	Quinic acid	0	0	0	143.1	0	0	705.9	509	475.1	0	0	0	139.5	0	0	4855	4590	4259	11100	10770	11700	22510	19690	24540	8931	4814	6908	4855	4790	4220	13270	13390	13320	13690	29500	30410	27720	28010	29040	10750	11790	10170	643.3	729.9	699.9
	Suberic acid	8938	11780	10820	28010	28320	27020	46060	44230	45430	22180	23550	25940	75750	74150	76220	7323	7587	7308	19600	19360	21080	26350	25770	26840	21570	22340	21950	46110	47130	43040	1935	1879	1945	6337	6436	6575	7436	7748	7819	19510	16870	19890	7180	8197	7609
	Sucrose	0	0	0	0	0	0	0	0	0	0	0	0	0	0	0	17730	17020	14370	3709	5658	6333	4540	3297	4537	5785	12540	7408	5494	5256	5083	2617	2723	2904	2416	2538	2448	2728	2779	2815	1304	1588	1893	4077	4943	5066
	Tryptophan	0	0	0	0	0	0	0	0	0	0	0	0	0	0	0	0	0	0	0	0	0	0	0	0	0	0	0	0	0	0	2093	2218	2242	965.6	992.5	975.9	951.2	1130	1097	172.9	180.2	158.7	2126	2287	2126
	Uridine 5'-monophosphate	0	0	0	0	0	0	0	0	0	0	0	0	0	0	0	0	0	0	0	0	0	0	0	0	0	0	0	0	0	0	1308	2109	2133	2242	2216	2369	1359	1244	1355	11140	11430	11590	1096	1114	1068
	Uridine	0	0	0	0	0	0	0	0	0	0	0	0	0	0	0	1614	1672	1654	2078	1791	2129	2233	1248	2025	2026	1894	2286	1804	1841	1581	11970	12840	13350	9681	9701	9882	12150	12770	12910	9001	8512	8756	11560	11880	11480
	Vanillic acid	0	0	0	0	0	0	0	0	0	0	0	0	0	0	0	578.4	557.7	494.8	1542	1392	1647	1148	1009	1193	1318	1343	1613	832.3	704.7	567.5	1717	1920	1845	2024	1907	2023	2438	2360	2535	644.6	1269	1038	1816	1970	1886
